# Supplementary material
Source: PubMed Central journal article supplement (PMC4716739)

# EPI

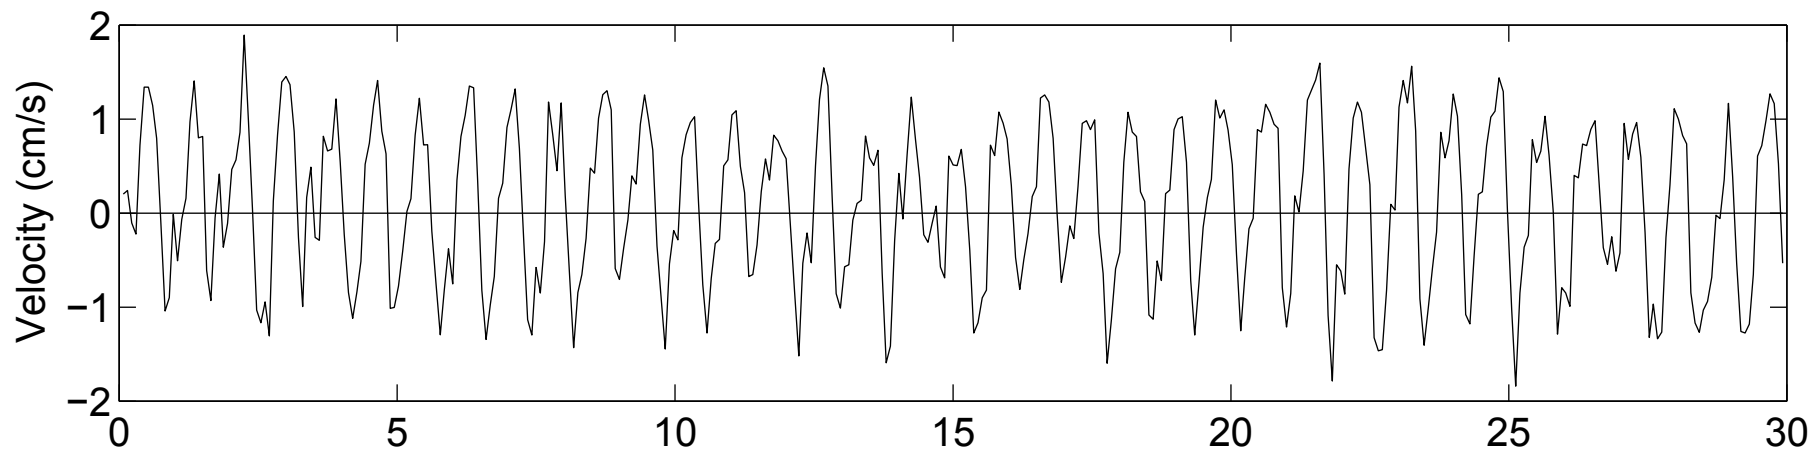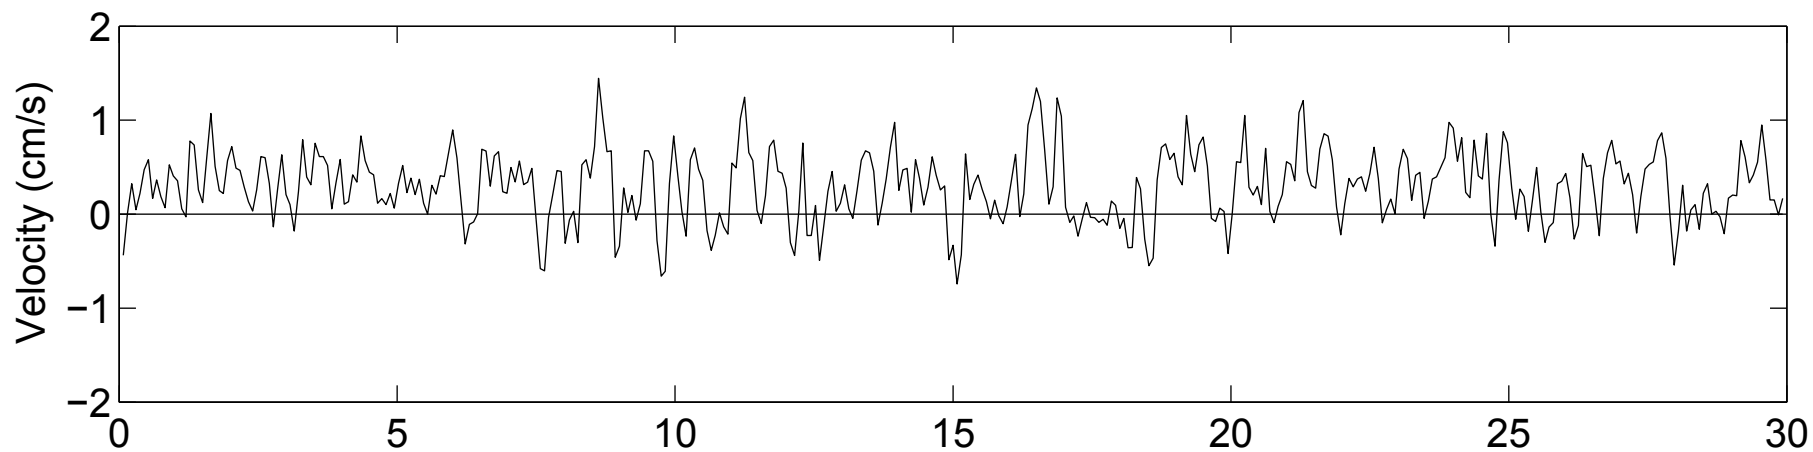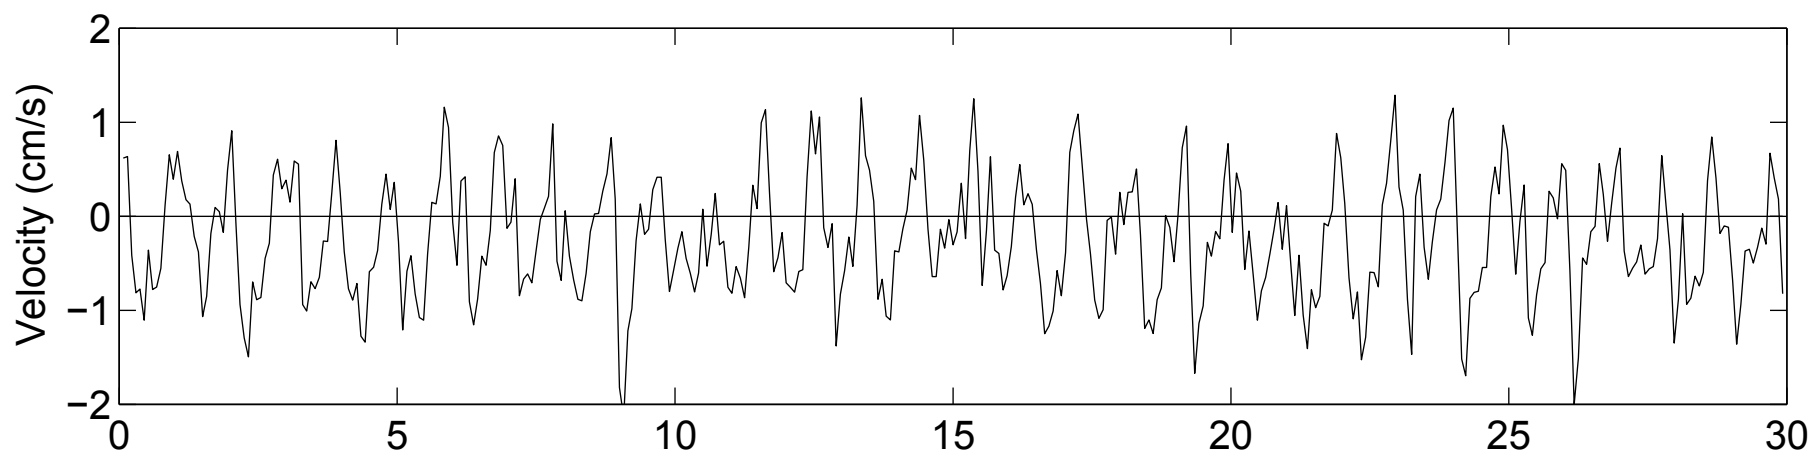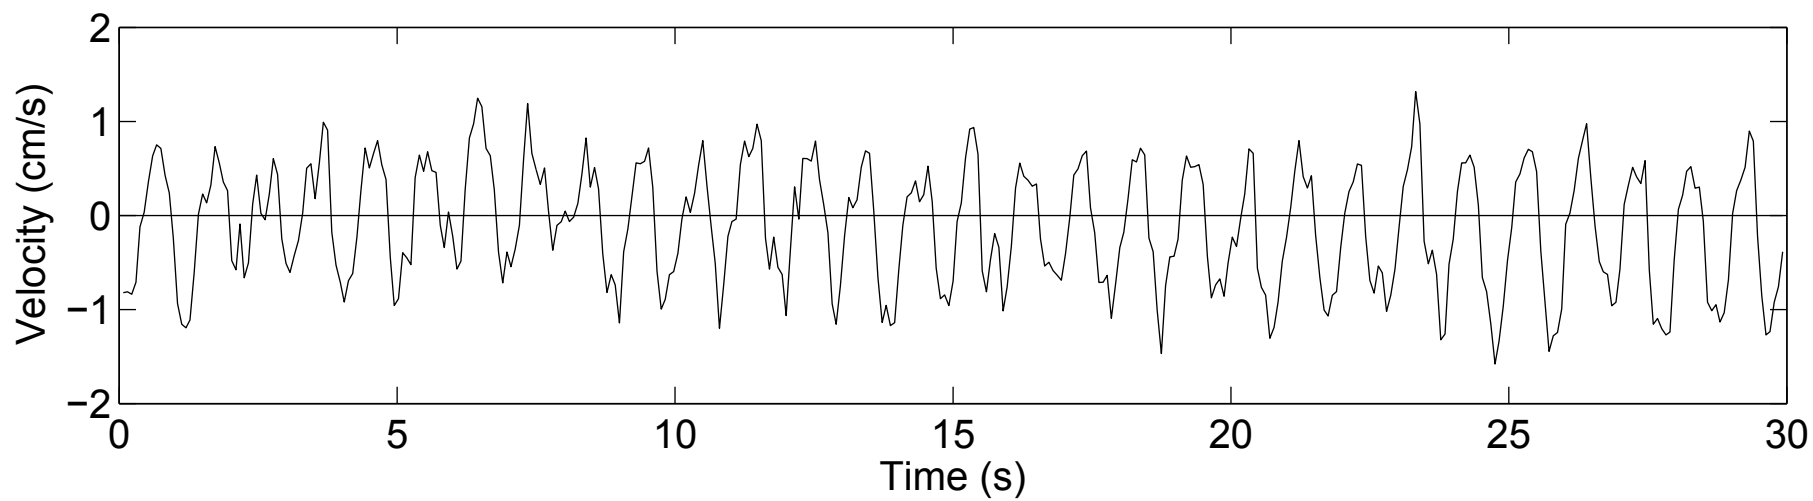

# GRE

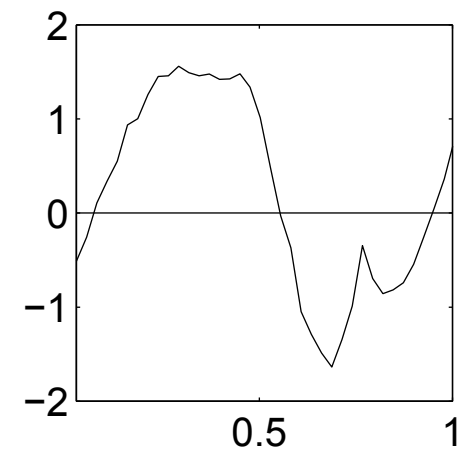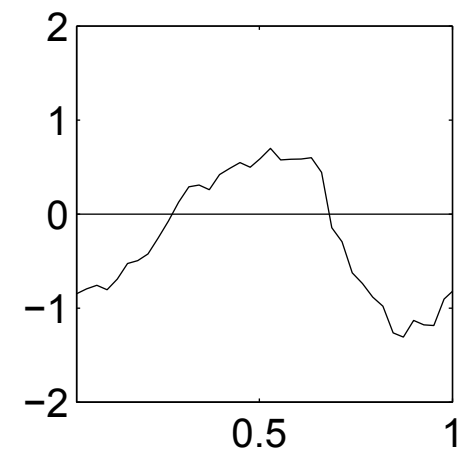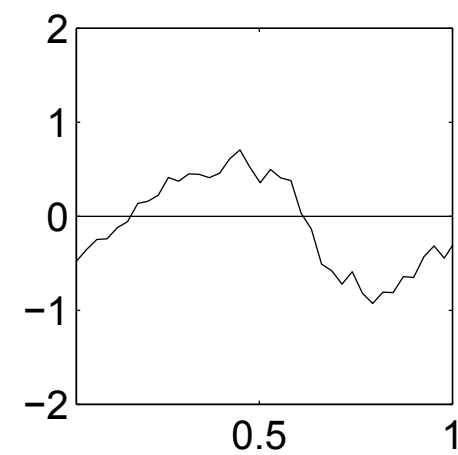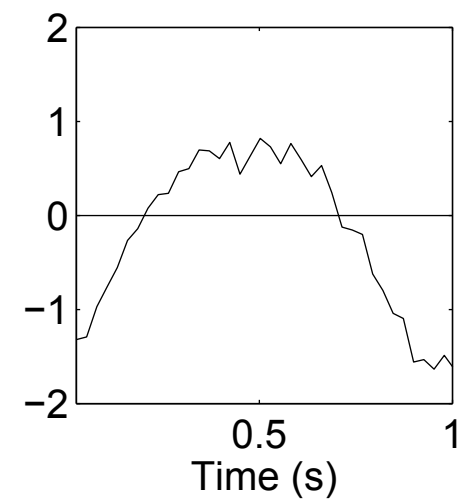

Supplement: NIHMS718047-supplement-1.pdf [file NIHMS718047-supplement-1.pdf]

Free

Fast (Cued)

Slow (Cued)

Hold (Insp)

Hold (Exp)

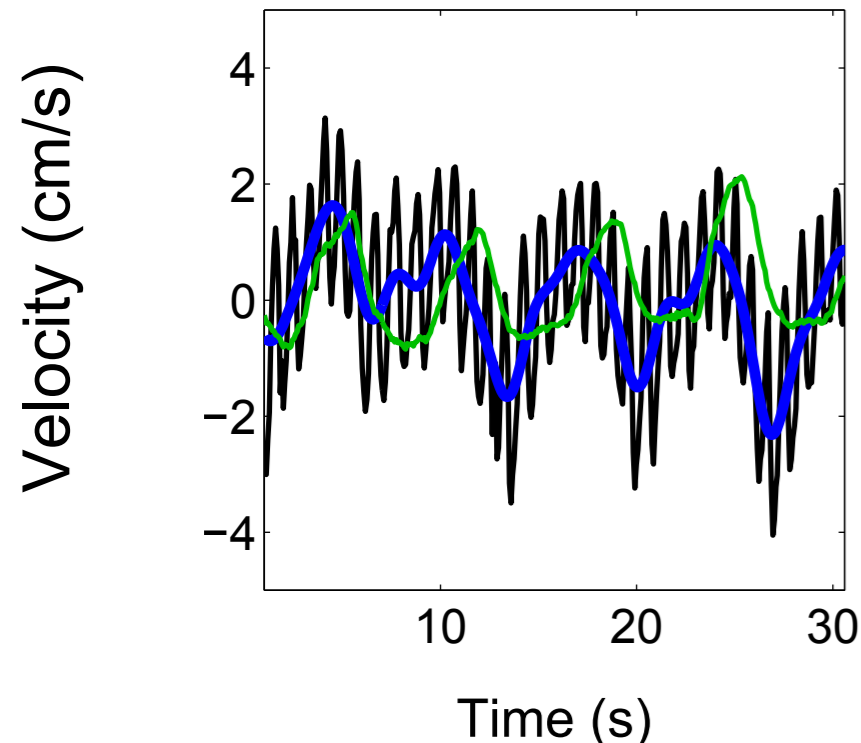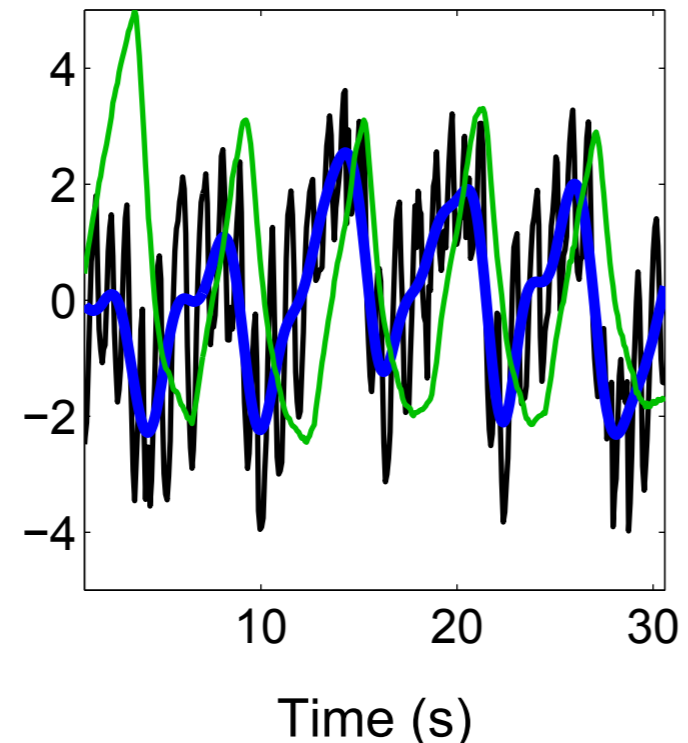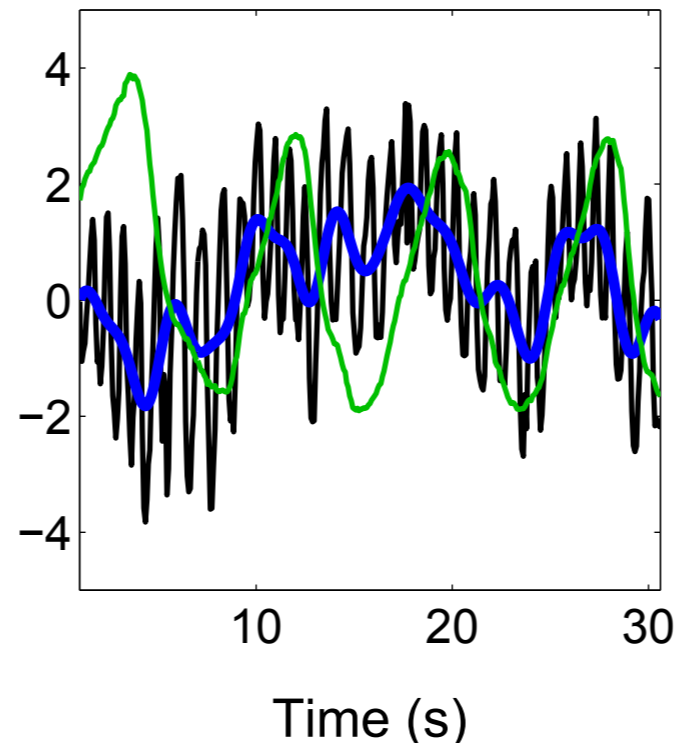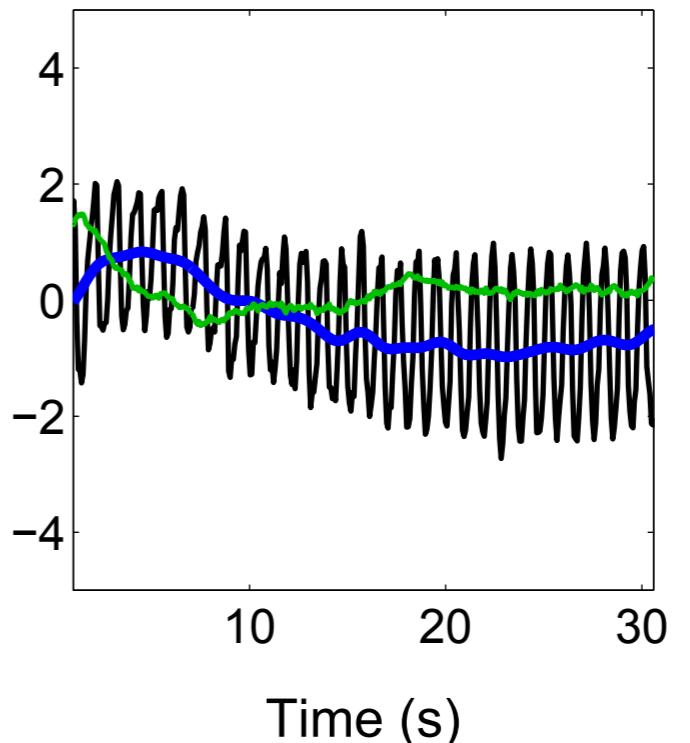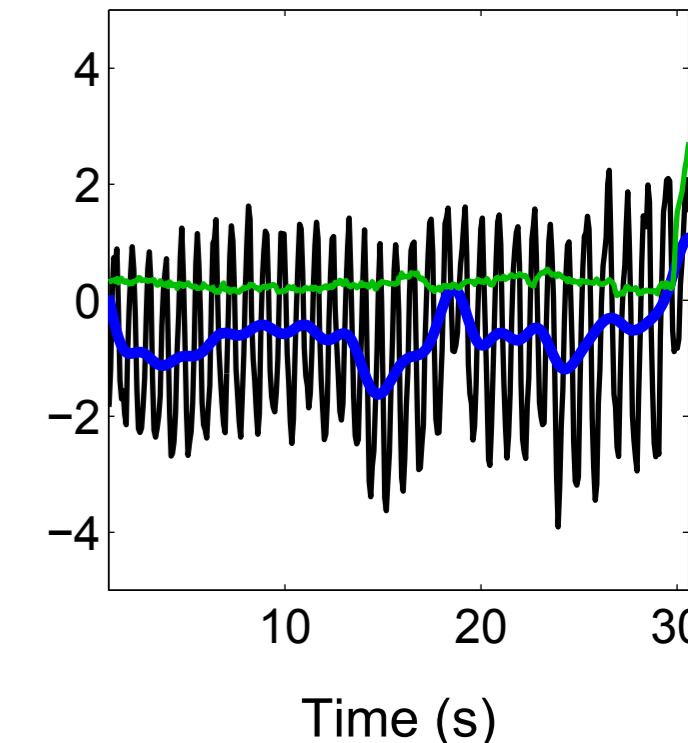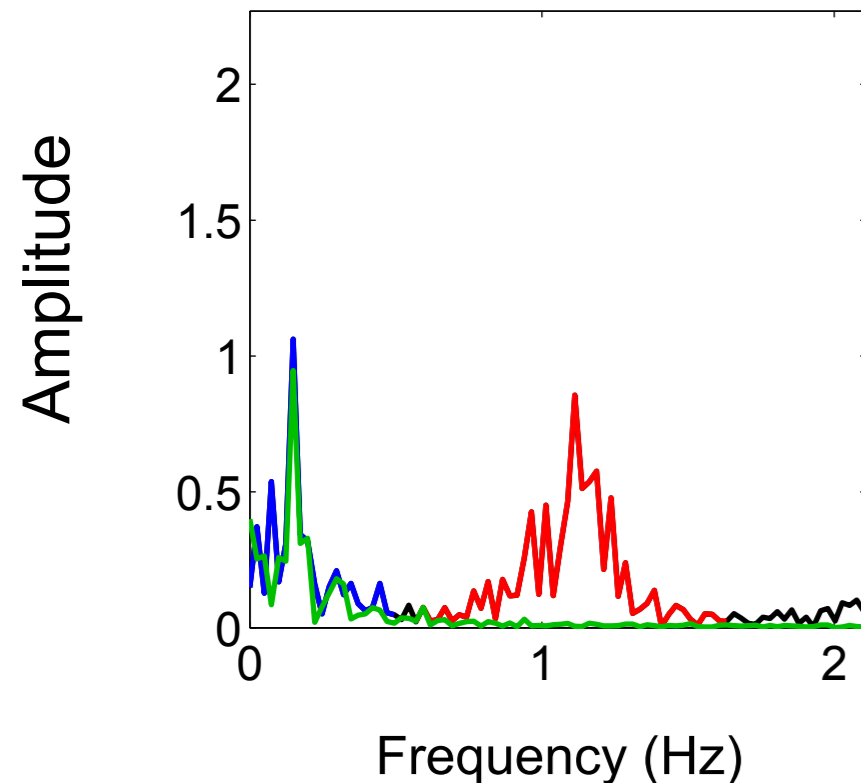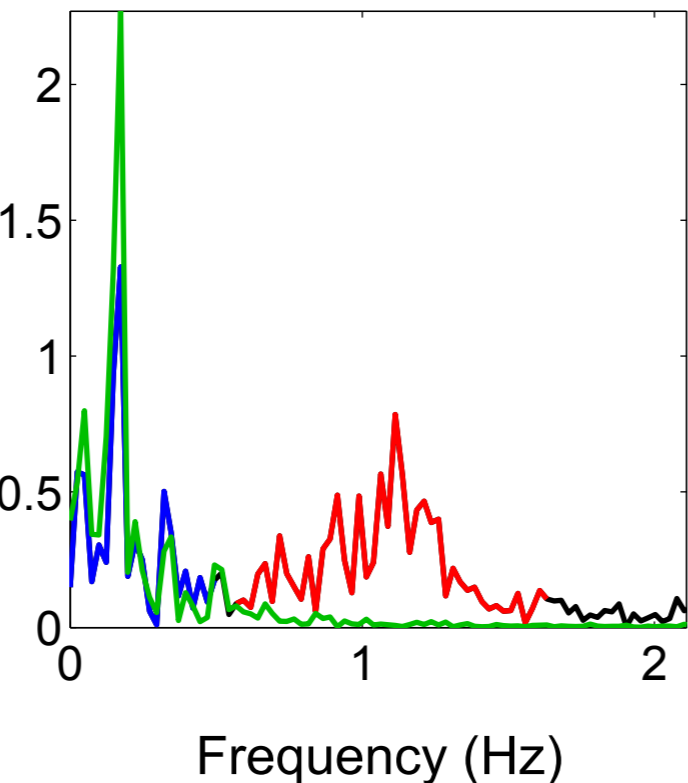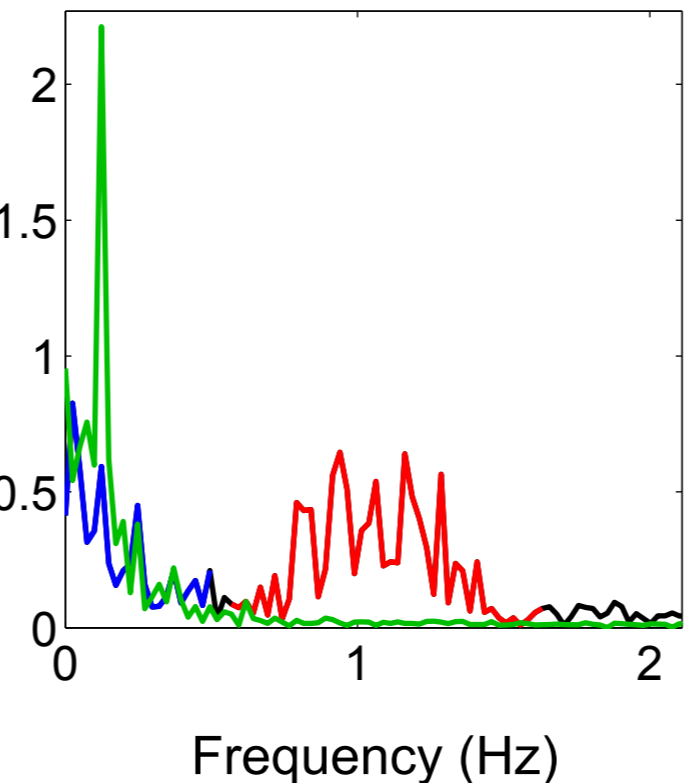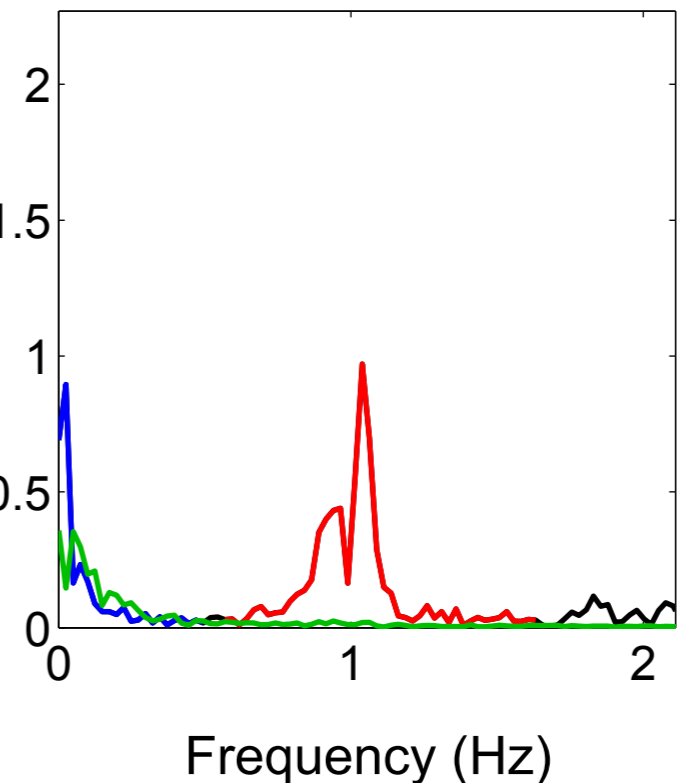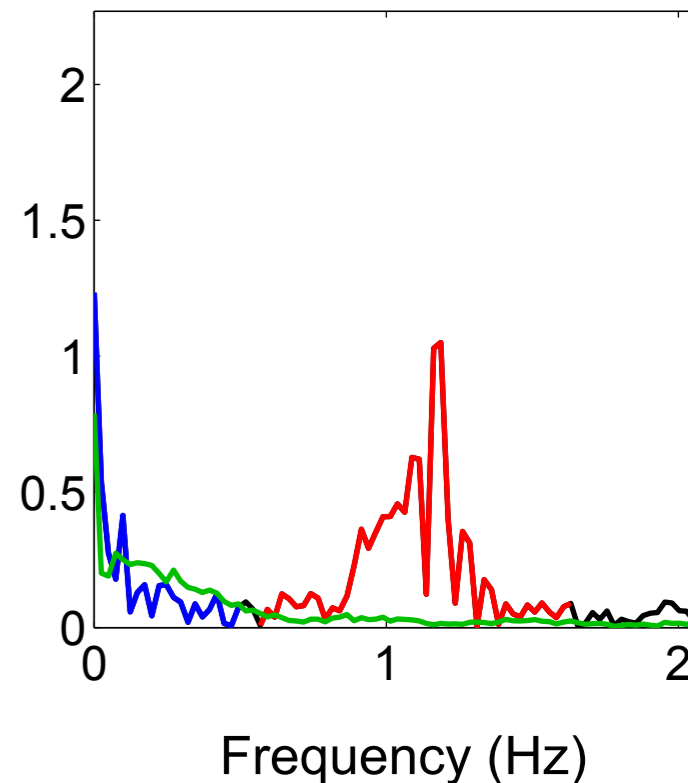

Supplement: NIHMS718047-supplement-2.pdf [file NIHMS718047-supplement-2.pdf]
